# Supplementary material for: H19 Noncoding RNA, an Independent Prognostic Factor, Regulates Essential Rb-E2F and CDK8-β-Catenin Signaling in Colorectal Cancer
Source: PubMed Central journal article supplement — eBioMedicine. 2016 Oct 19;13:113–24. doi: 10.1016/j.ebiom.2016.10.026 (PMC5264449; doi:10.1016/j.ebiom.2016.10.026), 2016-10-19
Supplement: mmc1.pdf [file mmc1.pdf]

## **Supplementary Materials**

### **H19 Noncoding RNA, an independent prognostic factor, regulates essential Rb-E2F and CDK8/ $\beta$ -catenin signaling in colorectal cancer**

Masahisa Ohtsuka, Hui Ling, Cristina Ivan, Martin Pichler, Daisuke Matsushita, Matthew Goblirsch, Verena Stiegelbauer, Kunitoshi Shigeyasu, Xinna Zhang, Meng Chen, Fnu Vidhu, Geoffrey A. Bartholomeusz, Yuji Toiyama, Masato Kusunoki, Yuichiro Doki, Masaki Mori, Shumei Song, Jillian R. Gunther, Sunil Krishnan, Ondrej Slaby, Ajay Goel, Jaffer A. Ajani, Milan Radovich, George A. Calin

#### **Appendix A. Supplementary figures 1-7**

#### **Appendix B. Supplementary tables 1-5**

#### **Appendix C. Supplementary Experimental Procedures**

## Appendix A. Supplementary figures 1-7

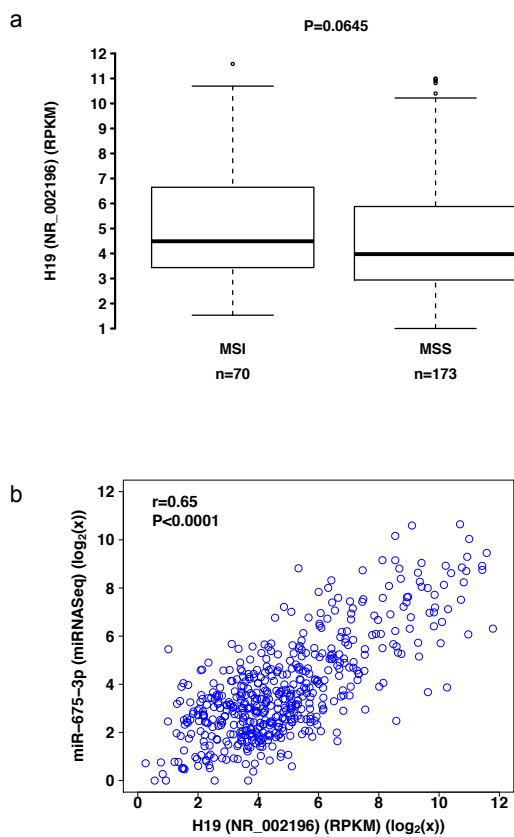

Figure S1 related to Figure 1: Association of H19 expression with microsatellite status (a), and with miR-675-3p expression (b) in TCGA CRC dataset.

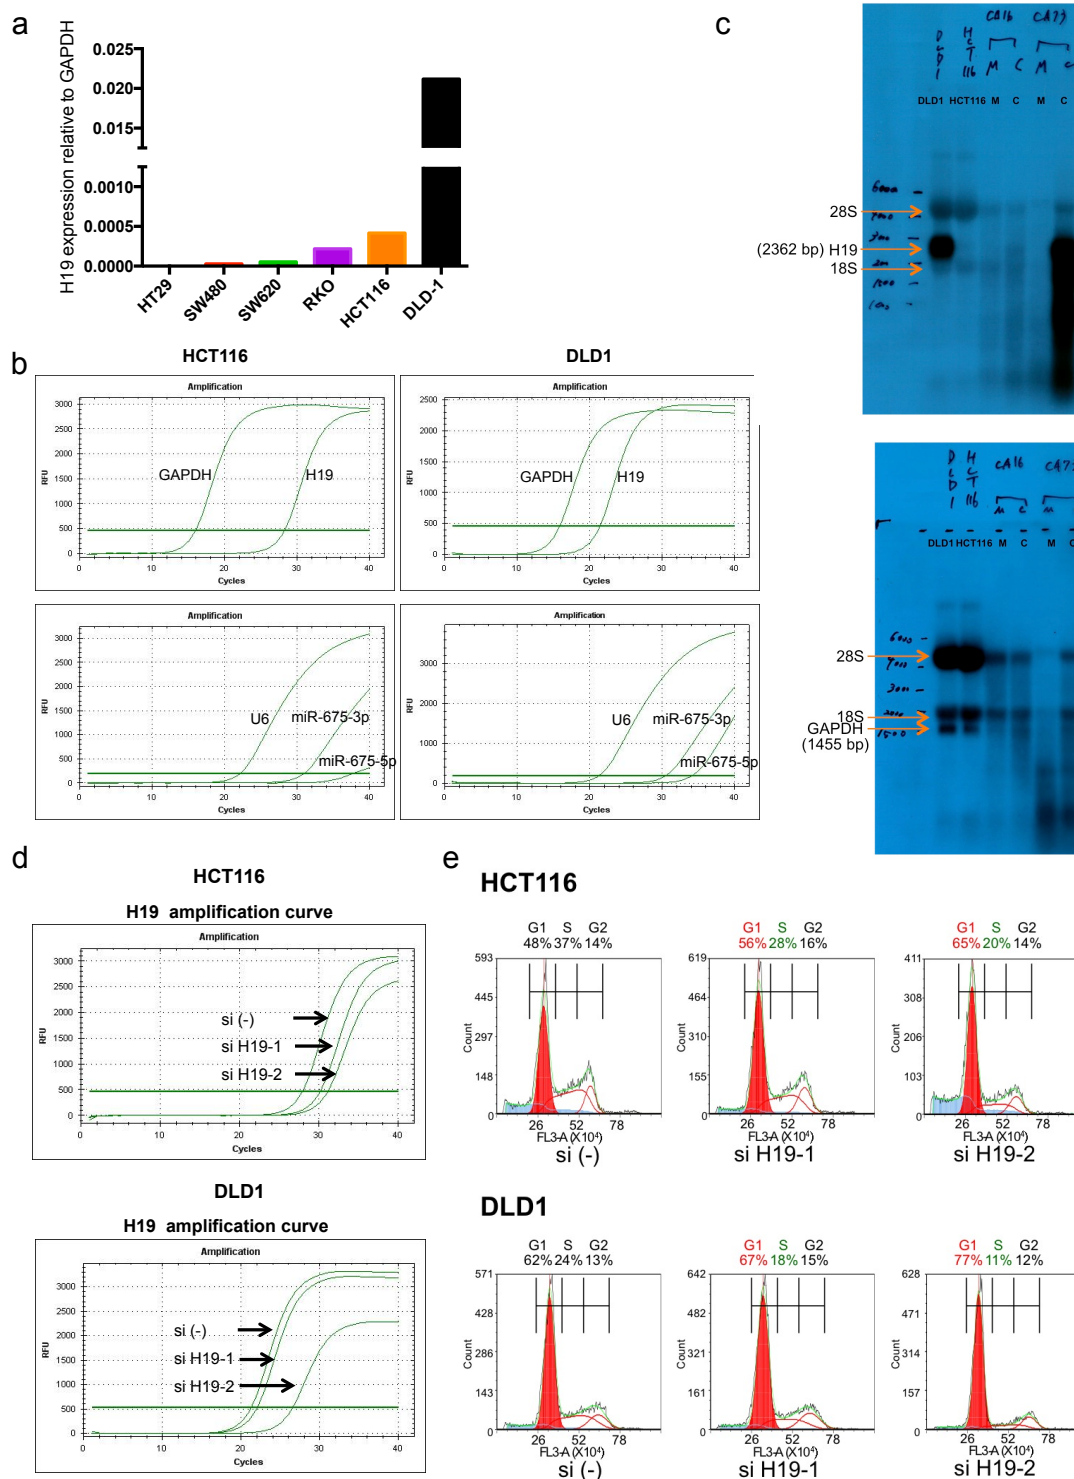

**Figure S2 related to Figure 2: H19 expression in CRC cell line and effect of H19 silencing on cell cycle distribution.** (a) qRT-PCR of H19 expression. (b) Amplification curve of the real-time PCR. (c) Northern blot analysis of H19 expression in CRC cell lines and paired CRC tumor (C) and mucosa (M). (d) Amplification curve of the real-time PCR. (e) H19 silencing blocked the G1-S cell cycle progression, as revealed by propidium iodide staining and flow cytometric analysis.

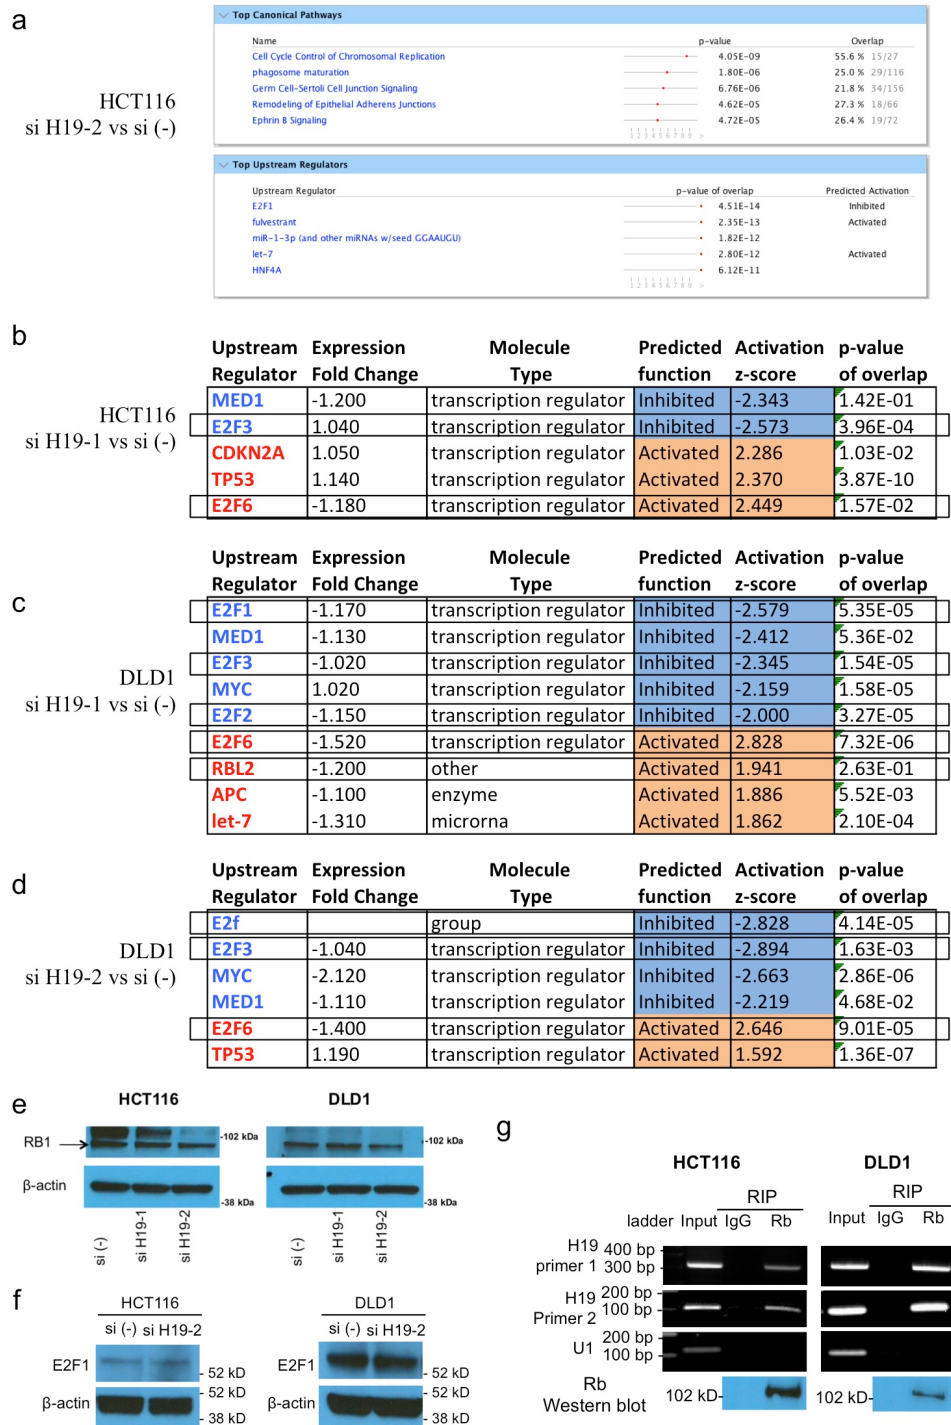

**Figure S3 related to Figure 3: Effect of H19 on RB1-E2F signaling.** (a) Summary page of the ingenuity pathway analysis showing predicted pathway changes, and E2F1 as most significant upstream regulator. (b) Upstream regulator prediction with HCT116 si H19-1 array data. (c) Upstream regulator prediction with DLD1 si H19-1 array data. (d) Upstream regulator prediction with DLD1 si H19-2 array data. (e, f) H19 does not change RB1 or E2F1 protein expression. The E2F activator including E2F1, E2F2, and E2F3 are predicted as inhibited, and E2F inhibitor including E2F6 and RBL2 are predicted as activated. (g) H19 interaction with RB1, determined with RNA immunoprecipitation assay. U1 as negative control.

[http://nemates.org/MA/progs/overlap\\_stats.html](http://nemates.org/MA/progs/overlap_stats.html)

siH19 and siCTNNB1: downregulated genes more than 2 fold overlap

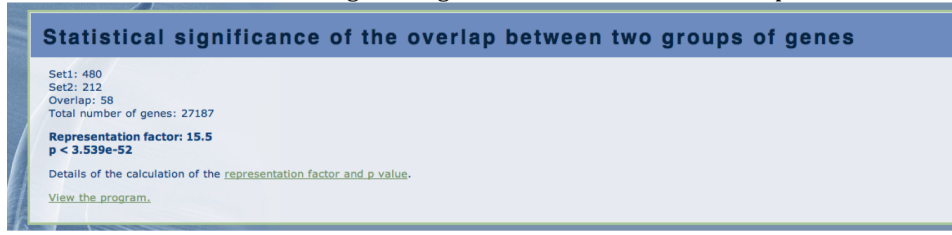

siH19 and siCTNNB1: UPregulated genes more than 2 fold overlap

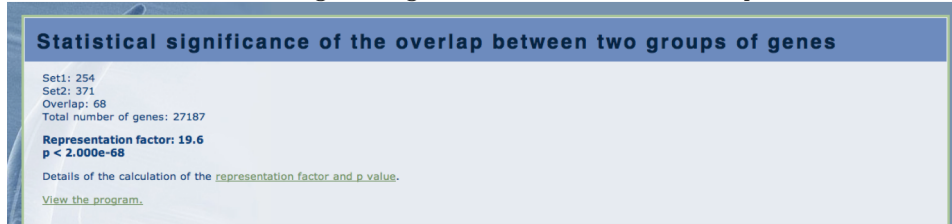

**Figure S4 related to Figure 4: Statistically analysis on the overlap of regulated genes between H19 and CTNNB1.** The overlap is significant ( $p < 5.357e-89$ ; representation factor 17.8, a representation factor  $> 1$  indicates more overlap than expected of two independent groups); and ( $p < 7.483e-72$ ; representation factor 17.6, a representation factor  $> 1$  indicates more overlap than expected of two independent groups) as determined using the online program of statistical significance of the overlap between groups of genes ([http://nemates.org/MA/progs/overlap\\_stats.html](http://nemates.org/MA/progs/overlap_stats.html)).

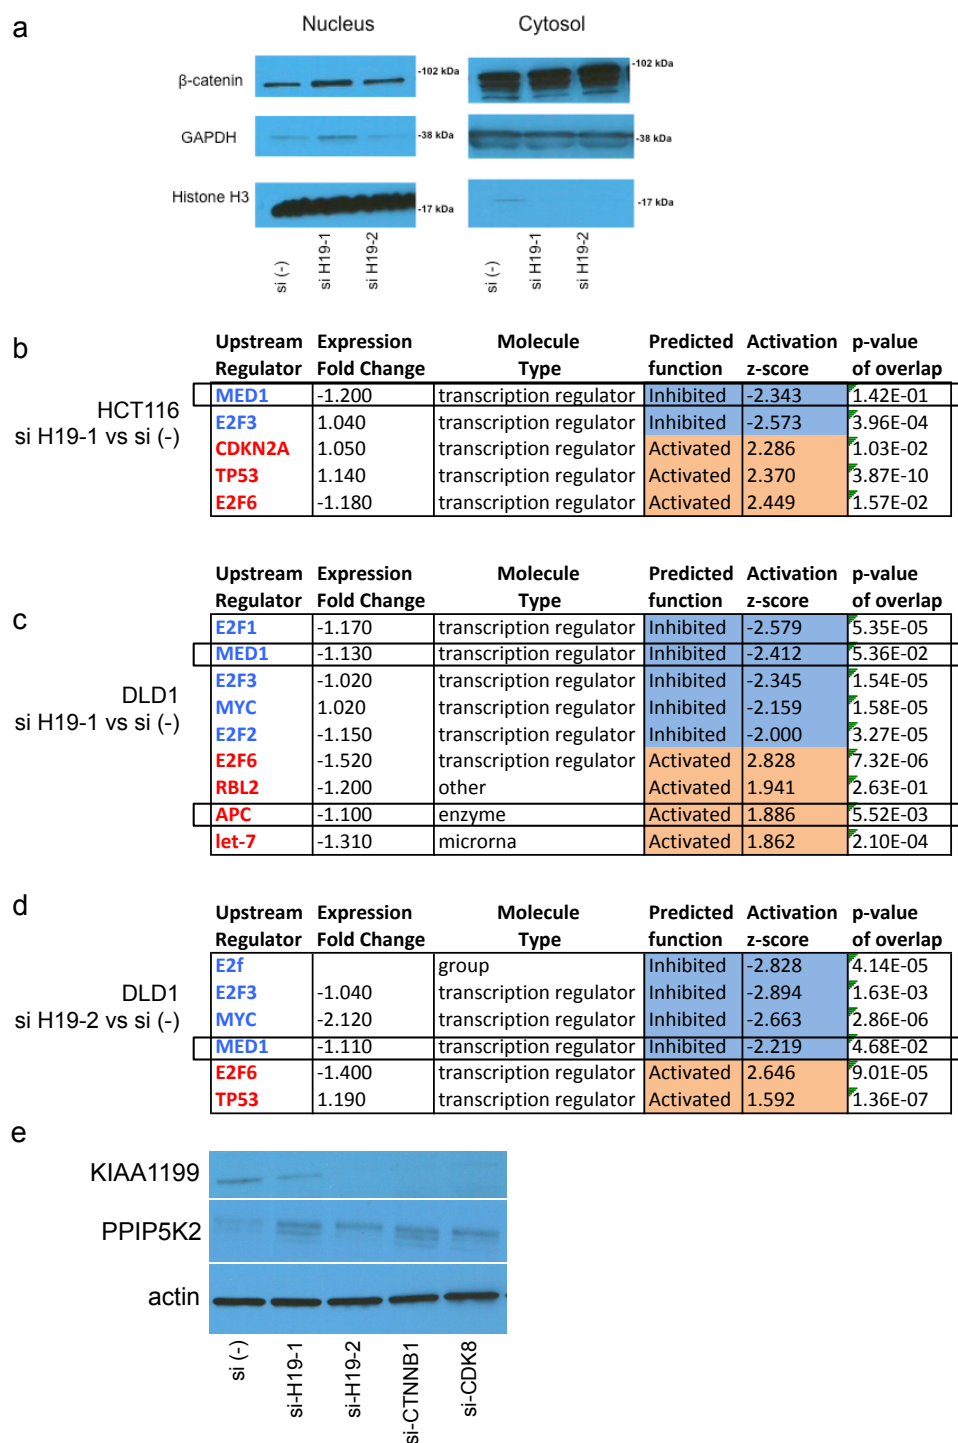

**Figure S5 related to Figure 5: Effect of H19 on CDK8 and  $\beta$ -catenin activity.** (a) Silencing H19 does not reduce nuclear expression of  $\beta$ -catenin protein. (b) Upstream regulator prediction with HCT116 si H19-1 array data. (c) Upstream regulator prediction with DLD1 si H19-1 array data. MED1, reflecting mediator activity of CDK8, is predicted as inhibited, and APC, the negative regulator of  $\beta$ -catenin, is predicted as activated. (d) Upstream regulator prediction with DLD1 si H19-2 array data. MED1, reflecting mediator activity of CDK8, is predicted as inhibited, and APC, the negative regulator of  $\beta$ -catenin, is predicted as activated. (e) The effect of H19 knockdown, CTNNB1 knockdown and CDK8 knockdown on KIAA1199 and PPIP5K2 in HCT116 cells.

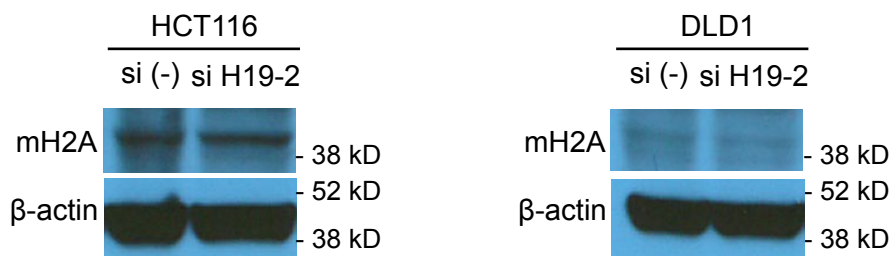

**Figure S6 related to Figure 6: Silencing H19 does not significantly change macroH2A protein levels.**

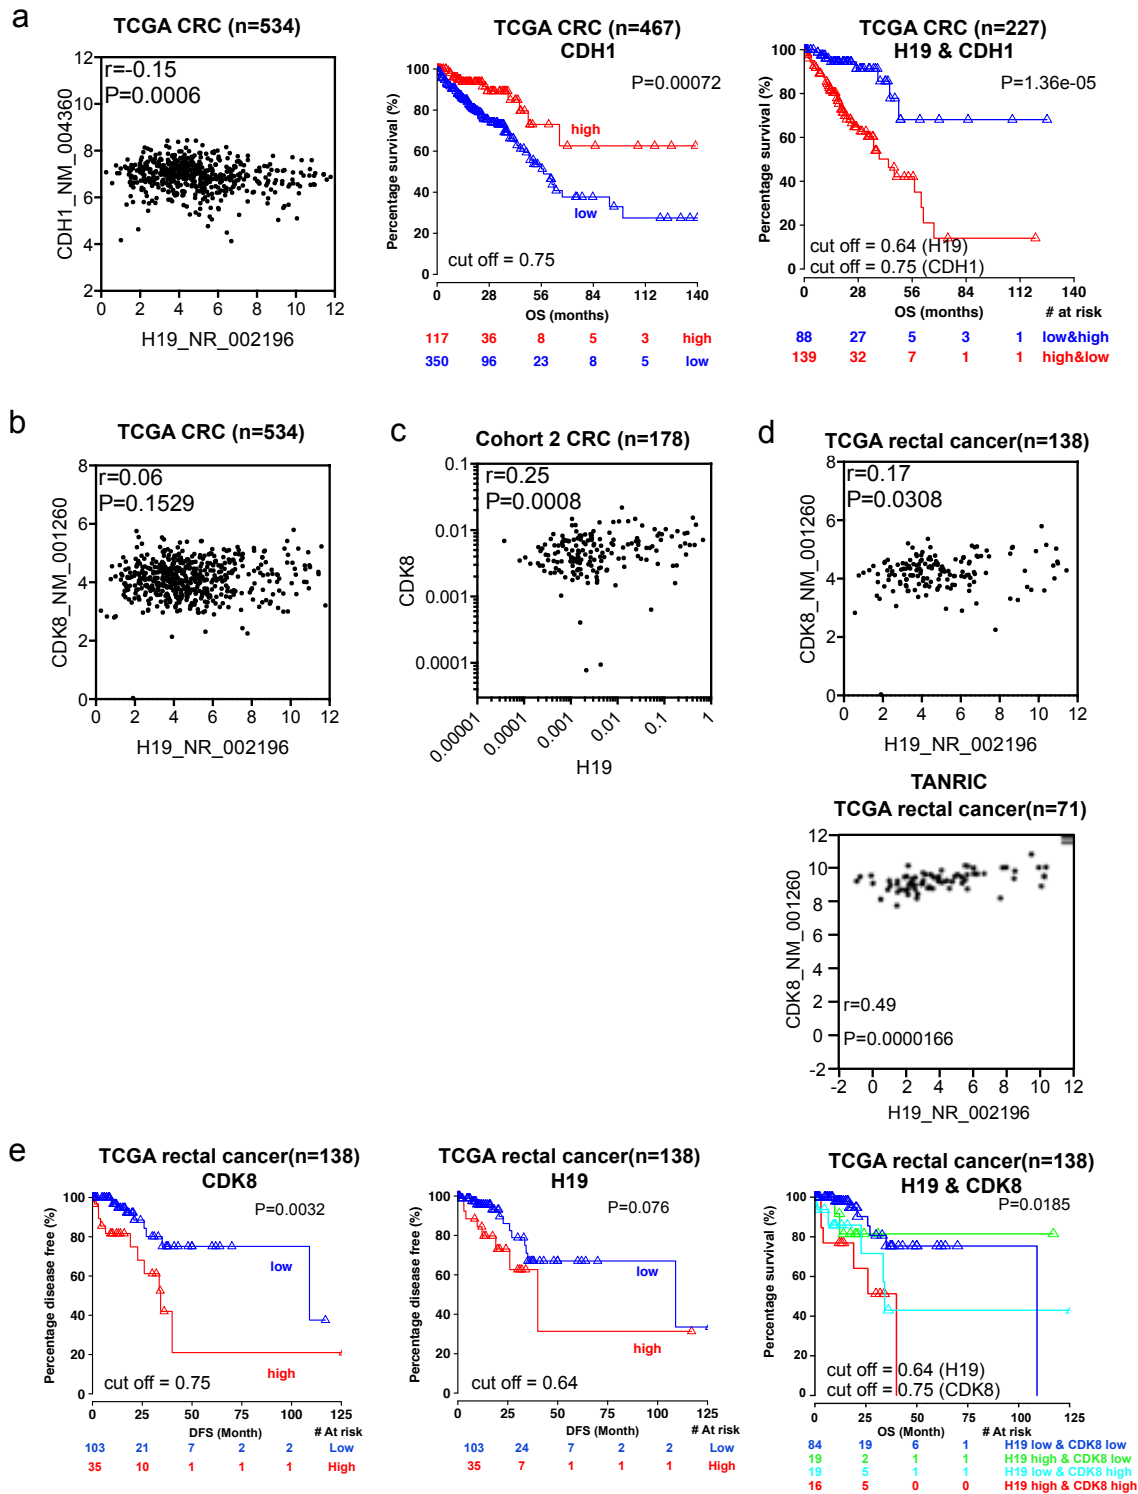

**Figure S7 related to Figure 7: Clinical significance of H19 and its molecular targets in CRC.** (a) Expression correlation of H19 and CDH1, and their association with overall survival in TCGA CRC dataset. (b, c) Association of H19 and CDK8 RNA expression in CRC samples. (d) Significant expression correlation between H19 and CDK8 in TCGA rectal cancer samples analyzed by us (upper image) or retrieved by TANRIC open-access resource (lower image). (e) Association of CDK8 and H19 with shorter disease-free survival in TCGA rectal cancer cases.

Appendix B. Supplementary tables 1-5

Table S1 related to Figure 1: Main characteristics of patients and tissue samples

|                          | TCGA (n=534) | Cohort 2 (n=178) | Cohort 3 (n=117) |
|--------------------------|--------------|------------------|------------------|
| Median age (range) years | 66.5 (31-90) | 67.9 (37-92)     | 64.8 (18-88)     |
| SEX                      |              |                  |                  |
| Male                     | 281 (52.6%)  | 104 (58.4%)      | 70 (59.8%)       |
| Female                   | 250 (46.8%)  | 74 (41.6%)       | 47 (40.2%)       |
| Not known                | 3 (0.6%)     | 0                | 0                |
| Tumor location           |              |                  |                  |
| Colon                    | 381 (71.3%)  | 110 (61.8%)      | 117 (100%)       |
| Rectum                   | 153 (28.7%)  | 67 (37.6%)       |                  |
| Not known                |              | 1 (0.6%)         |                  |
| Stage                    |              |                  |                  |
| I                        | 88 (16.5%)   | 34 (19.1%)       | 31 (26.5%)       |
| II                       | 198 (37.1%)  | 55 (30.9%)       | 38 (32.5%)       |
| III                      | 159 (29.8%)  | 50 (28.1%)       | 18 (15.4%)       |
| IV                       | 76 (14.2%)   | 37 (20.8%)       | 30 (25.6%)       |
| Not known                | 13 (2.4%)    | 2 (1.1%)         | 0                |
| MSI status               |              |                  |                  |
| MSI-H                    | 32 (6.0%)    |                  |                  |
| MSI-L                    | 38 (7.1%)    |                  |                  |
| MSS                      | 171 (32.0%)  |                  |                  |
| Not known                | 293 (54.9%)  |                  |                  |

MSS, microsatellite stable; MSI-H, microsatellite instability-high; TCGA, The Cancer Genome Atlas.

**Table S2 related to Figure 7: Univariate and multivariate analysis of clinical parameters and gene expression levels with overall survival of colorectal cancer patients.**

|        | UNIVARIATE                                            |                         |                 | MULTIVARIATE             |                |
|--------|-------------------------------------------------------|-------------------------|-----------------|--------------------------|----------------|
| cohort | Variable                                              | HR(95%CI)               | p-value         | HR(95%CI)                | p-value        |
| TCGA   | Age at Diagnosis                                      | 1.03(1.005,1.057)       | 0.0177          | 1.033(1.01, 1.06)        | 0.01343        |
|        | Gender (Male vs Female)                               | 1.09(0.62,1.93)         | 0.757           |                          |                |
|        | Tumor location (Right vs Left)                        | 1.66(0.94,2.96)         | 0.0826          |                          |                |
|        | Tumor Stage(Stage III-IV vs Stage I-II)               | 2.72(1.52,4.87)         | 7.43E-04        | 2.66(1.445,4.9)          | 0.001690       |
|        | <b>H19 &amp; CSRP2 (high&amp;high vs low&amp;low)</b> | <b>3.55(2.003,6.31)</b> | <b>1.48E-05</b> | <b>2.532(1.39, 4.61)</b> | <b>0.00242</b> |
|        | (cut-off=0.64, cut-off=0.71)                          |                         |                 |                          |                |

  

|        | UNIVARIATE                                           |                        |                    | MULTIVARIATE               |                 |
|--------|------------------------------------------------------|------------------------|--------------------|----------------------------|-----------------|
| cohort | Variable                                             | HR(95%CI)              | p-value            | HR(95%CI)                  | p-value         |
| TCGA   | Age at Diagnosis                                     | 1.04(1.01,1.065)       | 0.004829           | 1.03(1.009,1.063)          | 0.0093          |
|        | Gender (Male vs Female)                              | 1.1(0.63,1.89)         | 0.7465             |                            |                 |
|        | Tumor location (Right vs Left)                       | 1.61(0.93,2.78)        | 0.0875             |                            |                 |
|        | Tumor Stage(Stage III-IV vs Stage I-II)              | 2.27(1.28,4.02)        | 5.17E-03           | 2.56(1.43,4.59)            | 0.001500        |
|        | <b>H19 &amp; CDH1 (high&amp;low vs low&amp;high)</b> | <b>4.45(2.09,9.45)</b> | <b>0.000106256</b> | <b>3.955(1.851, 8.451)</b> | <b>0.000386</b> |
|        | (cut-off=0.64, cut-off=0.75)                         |                        |                    |                            |                 |

**Table S3 related to Experimental Procedures: Reagents used in this study.**

| Category | Name          | Cata log number    | Concentration used | Company |
|----------|---------------|--------------------|--------------------|---------|
| siRNA    | si-H19-1      | SASI_Hs02_00375635 | 50 nM              | Sigma   |
| siRNA    | si-H19-2      | SASI_Hs02_00375637 | 50 nM              | Sigma   |
| siRNA    | si-CTNNB1     | SASI_Hs02_00117960 | 50 nM              | Sigma   |
| siRNA    | si-CDK8       | SASI_WI_00000017   | 50 nM              | Sigma   |
| Chemical | Actinomycin D | A1410              | 10 µg/ml           | Sigma   |
| Chemical | Mytomycin C   | M0503              | 1 µg/ml            | Sigma   |

**Table S4 related to Experimental Procedures: Primers used in this study.**

| Applications | Name         | Forward primer           | Reverse primer             |
|--------------|--------------|--------------------------|----------------------------|
| qRT-PCR      | H19 primer 2 | TGCTGCACTTTACAACCACTG    | ATGGTGTCTTTGATGTTGGGC      |
| qRT-PCR      | CDK8         | ACCTGTTTGAATACGAGGGCT    | TGCCGACATAGAGATCCCAGT      |
| qRT-PCR      | CTNNB1       | CCCACTGGCCTCTGATAAAGG    | ACGCAAAGGTGCATGATTTG       |
| qRT-PCR      | CDH1         | TGAAGGTGACAGAGCCTCTGGAT  | TGGGTGAATTCGGGCTTGTT       |
| qRT-PCR      | CSRP2        | TGGGAGGACCGTGTAACCAC     | CCGTAGCCTTTTGGCCATA        |
| qRT-PCR      | JAG1         | GAAACAGCTCGCTGATTGCT     | ACCAAGCAACAGATCCAAGC       |
| qRT-PCR      | IGF1R        | TCGACATCCGCAACGACTATC    | CCAGGGCGTAGTTGTAGAAGAG     |
| qRT-PCR      | E2F1         | ACGTGACGTGTCAGGACCT      | GATCGGGCCTTGTTTGCTCTT      |
| qRT-PCR      | GAPDH        | ACCCAGAAGACTGTGGATGG     | TCTAGACGGCAGGTCAGGTC       |
| RIP          | H19 primer 1 | GGCAAGAAGCGGGTCTGTTT     | TGGCCATGAAGATGGAGTCG       |
| RIP          | H19 primer 2 | TGCTGCACTTTACAACCACTG    | ATGGTGTCTTTGATGTTGGGC      |
| RIP          | U1           | GGGAGATACCATGATCACGAAGGT | CCACAAATTATGCAGTCGAGTTTCCC |
| ChIP         | JAG1-TSS     | TGCGCAGCCTTTTATTCCCT     | GAGCACGCCCTCTCATGAAT       |
| ChIP         | JAG1-TBE     | CCCTTCAAAGGAAGTCGATG     | AGCCTCTGCTAACCCTCTC        |
| ChIP         | CDK8-TSS     | CTGGTTCCACGTGGTGCAATT    | CCCACTCTAGCCCGCTC          |
| ChIP         | CDK8-E2F1    | TTCCACGTGGTGCAATTGGC     | GCACAACAGCCGGTACCTC        |
| Nothern blot | H19 primer 1 | GGCAAGAAGCGGGTCTGTTT     | TGGCCATGAAGATGGAGTCG       |
| Nothern blot | GAPDH        | ACCCAGAAGACTGTGGATGG     | TCTAGACGGCAGGTCAGGTC       |

**Table S5 related to Experimental Procedures: Antibodies used in this study.**

| Applications | Name                | Catalog No.                                 |
|--------------|---------------------|---------------------------------------------|
| Western blot | $\beta$ -actin      | Sigma A1978                                 |
| Western blot | $\beta$ -catenin    | Santa Cruz sc-47752 or Cell Signaling #9562 |
| Western blot | CDK4                | Santa Cruz sc-260                           |
| Western blot | CDK8                | Cell Signaling #4106                        |
| Western blot | CSRP2               | Abcam ab178695                              |
| Western blot | Cyclin D1           | Cell Signaling #2978T                       |
| Western blot | E-cadherin          | Cell Signaling #3195                        |
| Western blot | E2F1                | Cell Signaling #3742                        |
| Western blot | GAPDH               | Santa Cruz sc-51905                         |
| Western blot | Histone H3          | Cell Signaling #9717                        |
| Western blot | IGF1R               | Cell Signaling #3027                        |
| Western blot | Jagged1             | Cell Signaling #2620                        |
| Western blot | KIAA1199            | ThermoFisher PA5-24444                      |
| Western blot | MacroH2A            | Santa Cruz sc-377452 X                      |
| Western blot | Phospho-Rb (Ser608) | Cell Signaling #2181                        |
| Western blot | PPIP5K2             | Bethyl lab A304-166A-T                      |
| Western blot | Rb                  | Cell Signaling #9309                        |
| RIP          | MacroH2A            | Santa Cruz sc-377452 X                      |
| RIP          | Rb                  | Cell Signaling #9309                        |
| ChIP         | $\beta$ -catenin    | Millipore 05-613                            |
| ChIP         | Polymerase II       | Millipore 05-623                            |

## Appendix C. Supplementary Experimental Procedures

### Cell Culture

The human colon cancer cell lines HCT116 and DLD1 were obtained from the American Type Culture Collection (Manassas, VA, USA) and grown as suggested by the supplier. Cells were cultured at 37°C in 5% CO<sub>2</sub>. All cell lines were validated by The Characterized Cell Line Core at MD Anderson Cancer Center using STR DNA fingerprinting.

### RNA interference experiments

HCT116 and DLD1 cells were transfected with a final concentration of 50 nM siRNA with Lipofectamine RNAiMAX reagent (Invitrogen) in Opti-MEM medium (Thermo Fisher Scientific) according to the manufacturer's protocol. The siRNAs specially targeting *H19*, *CTNNB1*, *CDK8*, and *E2F1* were obtained from Sigma-Aldrich (Table S3).

**Proliferation Assay.** After siRNAs treatment, CRC cells were seeded at a density of 1000 cells per well in 96-well cell culture plate. The viability of the cells was assessed by cell counting kit 8 (CCK8) (Dojindo Molecular Technical, Inc.) for 6 days or 7 days.

**Cell Scratch Assay.** After siRNAs treatment, cells were seeded and grown to 90% confluence in 6 well plates. We pretreat cells with 1  $\mu$ g/ml Mytomycin C to block proliferation, and used a 200  $\mu$ l pipet tip to generate gap in the cell monolayer. Images were captured as indicated time points afterwards. Cell migration area was quantified using Image J software.

**Cell-Cycle Assay.** After siRNAs treatment, cells were seeded into 10 cm dish and cultured at 60% confluent. The cells were washed with phosphate buffered saline (PBS), and then fixed in 70% ethanol overnight at 4°C. The fixed cells were washed, resuspended in PBS, and incubated with 20  $\mu$ g/ml of RNase A and 50  $\mu$ g/mL propidium iodide (PI) for 15 min in the dark. Subsequently, the processed samples were subjected by flow cytometric analysis.

**Click-iT EdU assay.** After siRNAs treatment, cells were pulsed for 30 minutes with 10  $\mu$ M 5-ethynyl-2'-deoxyuridine (EdU) (Click-iT EdU kit, Catalogue number C10424, Life Technologies). Media was replaced and cells were washed by 3% BSA in PBS, and then fixed by 4% paraformaldehyde for 15 minutes at room temperature. Cells were treated by 0.5% TritonX-100 in PBS and then incubated at room temperature for 20 minutes. We used Click-iT AlexaFluor 488 for staining of cells with EdU incorporations following the manufacturer's protocol. and DNA content was simultaneously measured with Hoechst 33342. The samples were analyzed by flow cytometric analysis with the equipment LSRFortessa<sup>TM</sup>X-20.

### Reverse Transcription Quantitative RT-PCR Analysis

Total RNA was extracted using the TRIzol protocol (Invitrogen) and DNase-digested (Ambion); the quality of the RNA was assessed using agarose gel electrophoresis. cDNA was generated from 1  $\mu$ g total RNA using the SuperScript III cDNA kit (Invitrogen) according to the manufacturer's protocol. Quantitative RT-PCR was performed using SsoAdvanced<sup>TM</sup> Universal SYBR<sup>®</sup> Green Supermix (Bio-Rad) on CFX 384 Real Time PCR Detection System (Bio-Rad) and relative gene expression levels were measured, according to the  $2^{-\Delta\Delta ct}$  method. Primer sequences are available in Table S4.

**Notch luciferase assay:** After siRNA treatment, cells were seed and transfected with Signal RBP-Jk Reporter (luc) Kit (Qiagen). 24 h after transfection, the luciferase activity of the reporter was analyzed with Dual-Glo<sup>®</sup> Luciferase Assay System (Promega), according to the manufacturer's instruction.

**Northern Blot.** Twenty  $\mu$ g of total RNA was mixed with 30  $\mu$ l RNA Sample Loading Buffer (Invitrogen) and 10  $\mu$ l Blue/Orange Loading Dye (Promega), denatured for 10 min at 65°C and separated on the gel (1.5g Agarose, 10×MOPS and H<sub>2</sub>O) and transferred BrightStar<sup>®</sup>-Plus Positively Charged Nylon Membrane (Ambion) in 0.5× TBE (Tris-borate-EDTA) buffer overnight. The RNA was cross-linked to the membrane matrix under UV (120000  $\mu$ J/cm<sup>2</sup>). The membrane was prehybridized with ULTRAhyb<sup>®</sup>-Oligo (Ambion) and then blotted with  $\alpha$ -32P-labeled H19 specific probe using Primer-it II Random Primer Labeling Kit (Agilent) overnight at 68 °C. The hybridization

signals were visualized by exposure to X-ray film (Kodak, USA). GAPDH was used as the internal reference. Primer sequences for generating the probes are available in **Table S4**.

**Plasmid and Virus Generation.** The lentivirus expression plasmids including pLOC-CDK8 (Clone ID: ccsbBroadEn\_00281) and negative control vector pLOC-RFP were purchased from Dharmacon. We produced virus soup in 293 FT cells according to the instructions of the manufacturer, and used it to induce CDK8 expression in CRC cells.

#### **Western Blot**

Total proteins were extracted with Cell Lysis Buffer (Cell Signaling) containing Protease Inhibitor Cocktail (Sigma) and Phosphatase Inhibitor Cocktail 2 (Sigma). 40  $\mu$ g of total proteins mixed with Pierce™ Lane Marker Reducing Sample Buffer (Thermo Scientific) were heated at 95 °C for 5 minutes, separated by a 4–20% Criterion TGX Precast Gel (Bio-rad), and transferred onto Trans-Blot® Turbo™ Midi Nitrocellulose Transfer Packs (Bio-rad). The membrane was blocked with 5% non-fat milk (Bio-rad), incubated with primary antibodies and secondary antibodies, and detected using the Thermo Scientific™ SuperSignal™ West Femto Chemiluminescent Substrate (Thermo scientific). The list of antibodies can be found in **Table S5**.
